# Supplementary material for: Bioimpedance study of body composition and phase angle in children, adolescents and adults of the Federal Territory Sirius
Source: Research Square preprint supplement (doi:10.21203/rs.3.rs-8619225/v1), 2026-01-30
Supplement: Supplementary file 1 [file 8de009e82973baec35fa73ec.pdf]

## Supplementary material

### Comparative Figures (ages 5–19 y)

Percentile overlays (P3–P97): shaded bands + median for external references vs Federal Territory Sirius (median, IQR, P3–P97). Methods differ (InBody 770, multi-frequency standing 8-electrode vs wrist–ankle supine configurations in national data; Medass ABC-01); therefore, comparisons are descriptive and not directly interchangeable. Odd figures: girls; even figures: boys.

S1–S2 (Weight-for-age, girls/boys, 5–19 y). Percentile overlays (P3–P97): WHO shaded bands + median vs Federal Territory Sirius (median, IQR, P3–P97).

S3–S4 (Height-for-age, girls/boys, 5–19 y). Same coding as S1–S2.

S5–S6 (BMI-for-age, girls/boys, 5–19 y; percentile view). Complementary to the main-text WHO SD-band figures.

S7–S8 (BMI-for-age, girls/boys, 5–19 y). Russia national references (Rudnev et al., 2014) vs Federal Territory Sirius (P3–P97).

S9–S10 (Height-for-age, girls/boys, 5–19 y). Russia national vs Federal Territory Sirius (P3–P97).

S11–S12 (Weight-for-age, girls/boys, 5–19 y). Russia national vs Federal Territory Sirius (P3–P97).

S13–S14 (Phase angle, °, girls/boys, 5–19 y). Russia national vs Federal Territory Sirius (P3–P97).

S15–S16 (SMM, kg, girls/boys, 5–19 y). Russia national vs Federal Territory Sirius (P3–P97).

S17–S18 (Fat mass, kg, girls/boys, 5–19 y). Russia national vs Federal Territory Sirius (P3–P97).

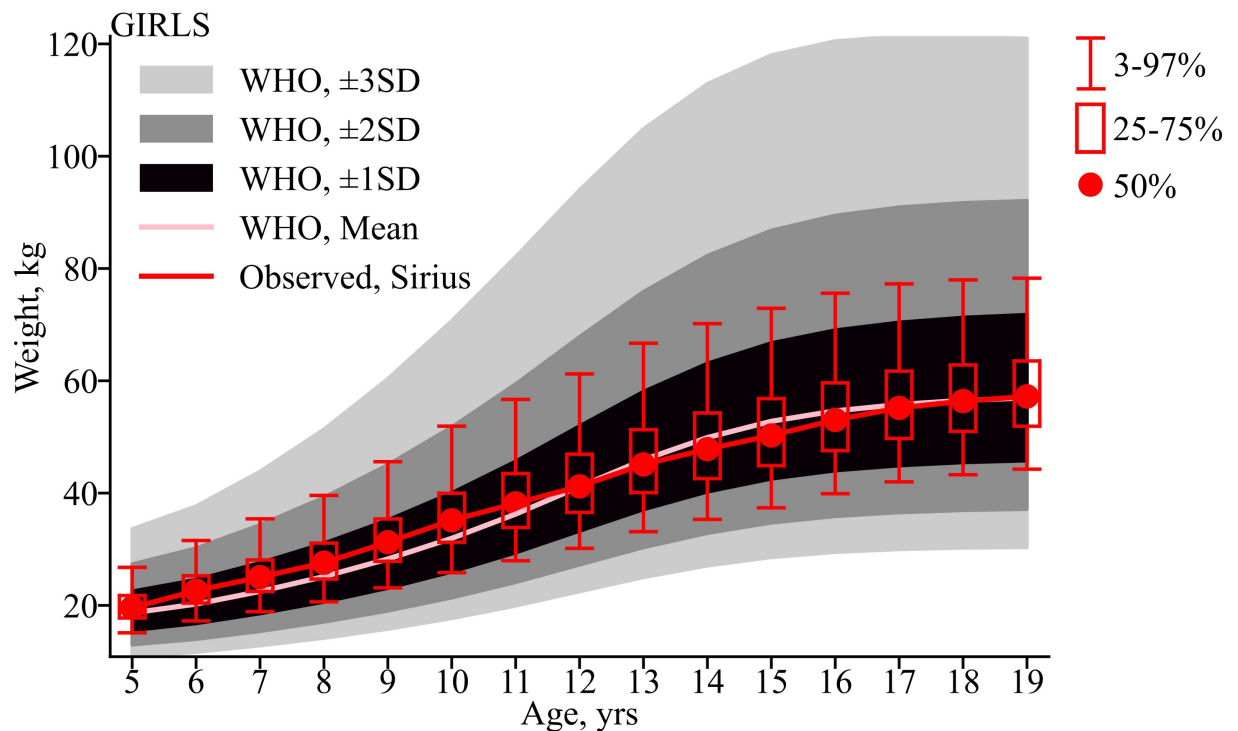

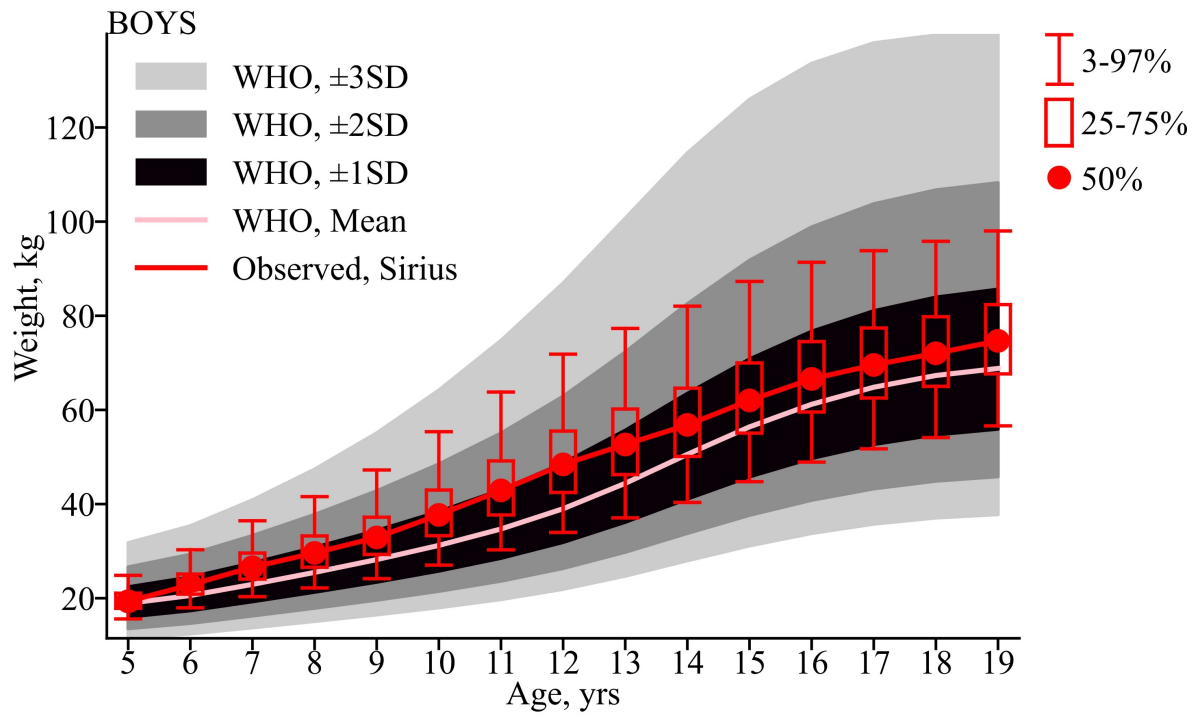

S2

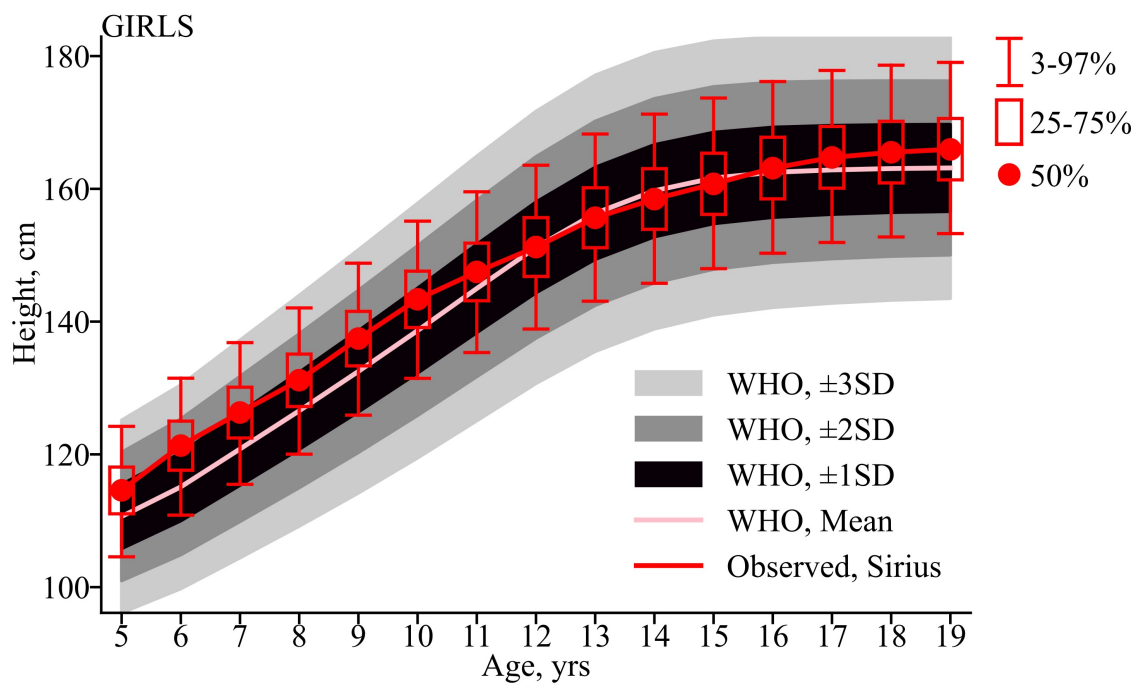

S3

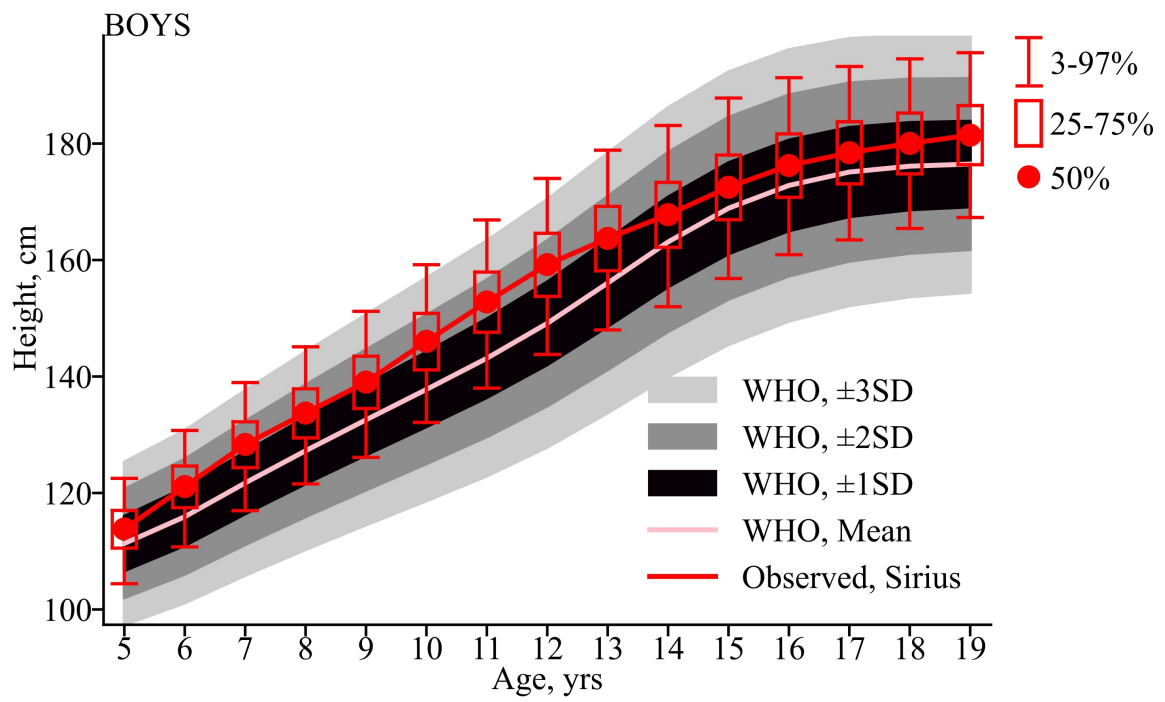

S4

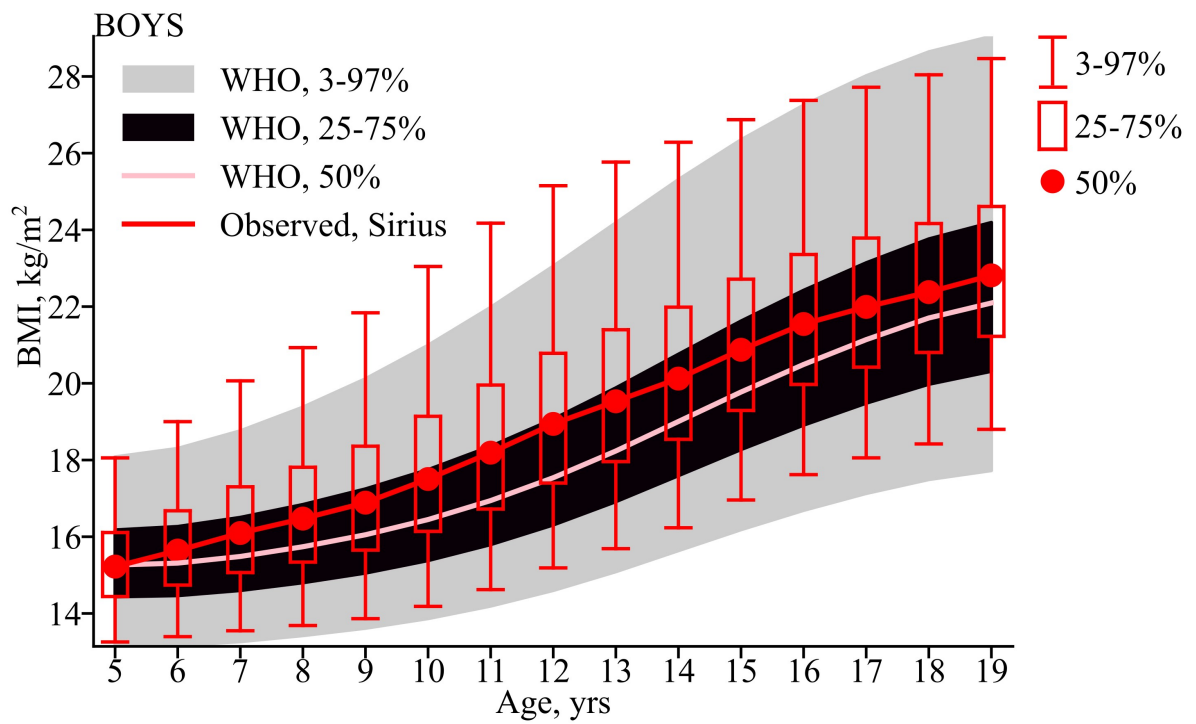

S5

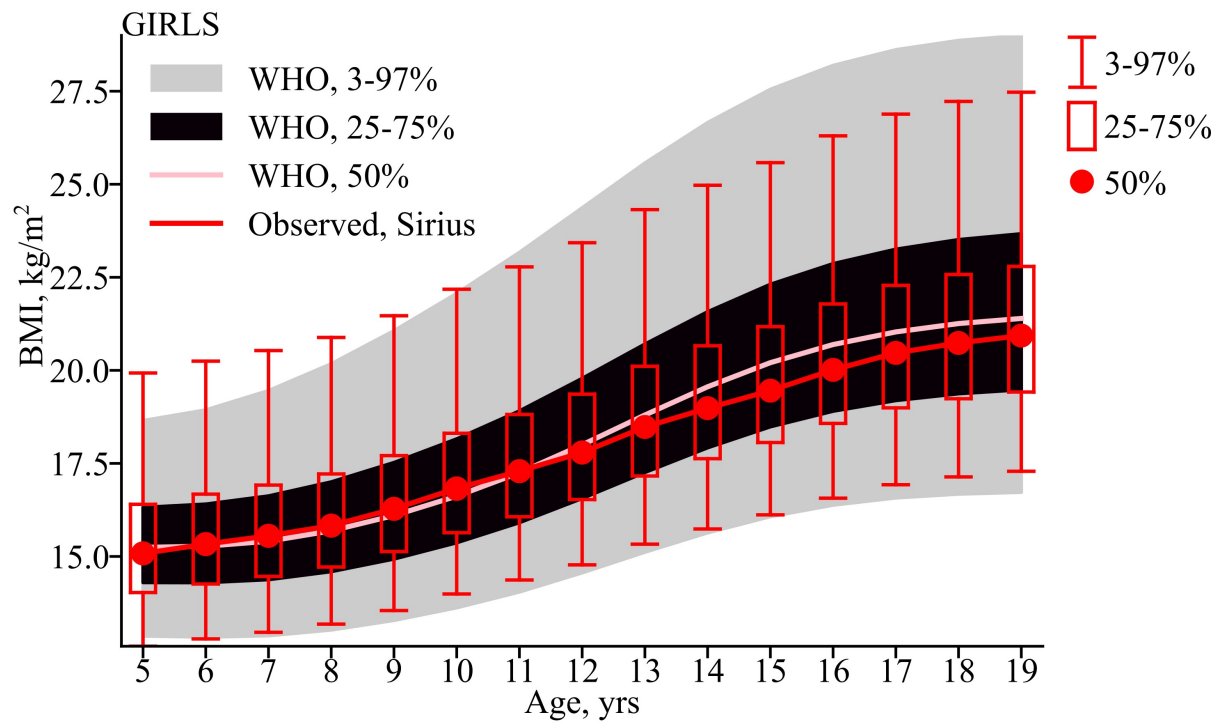

S6

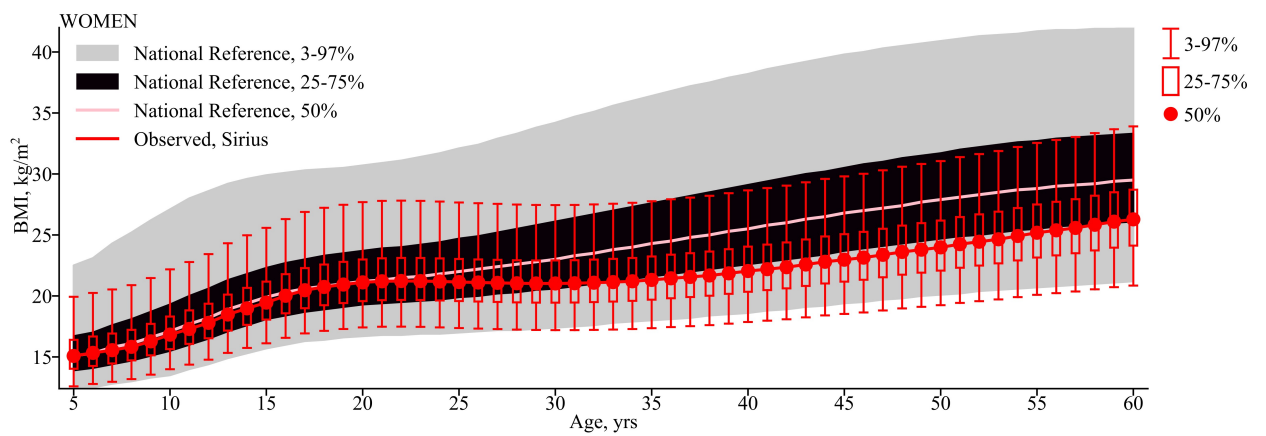

S7

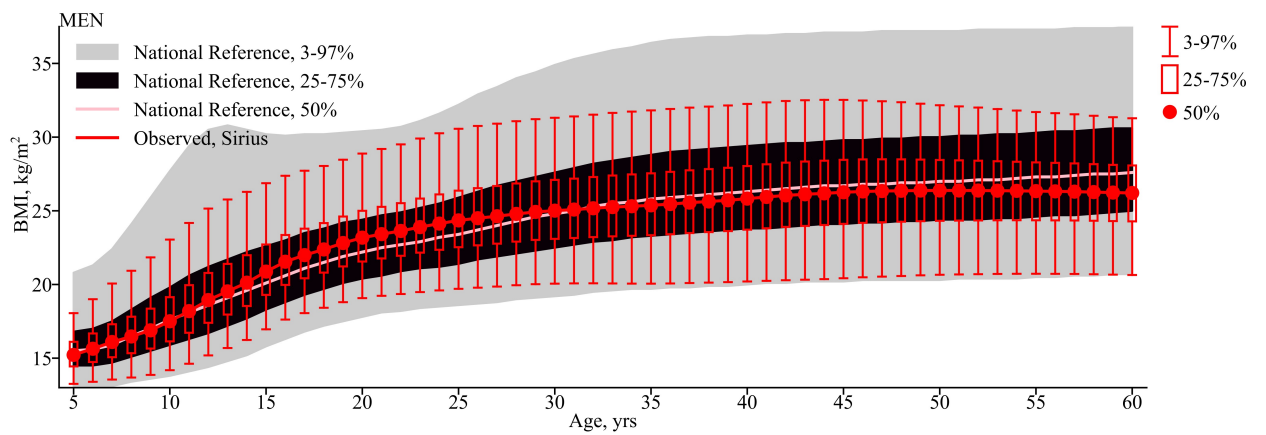

S8



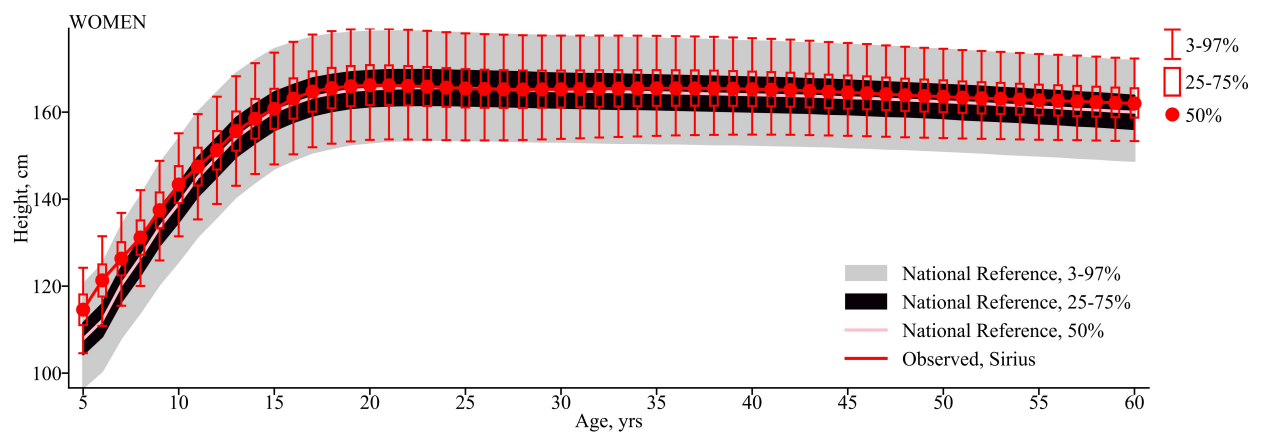

S9

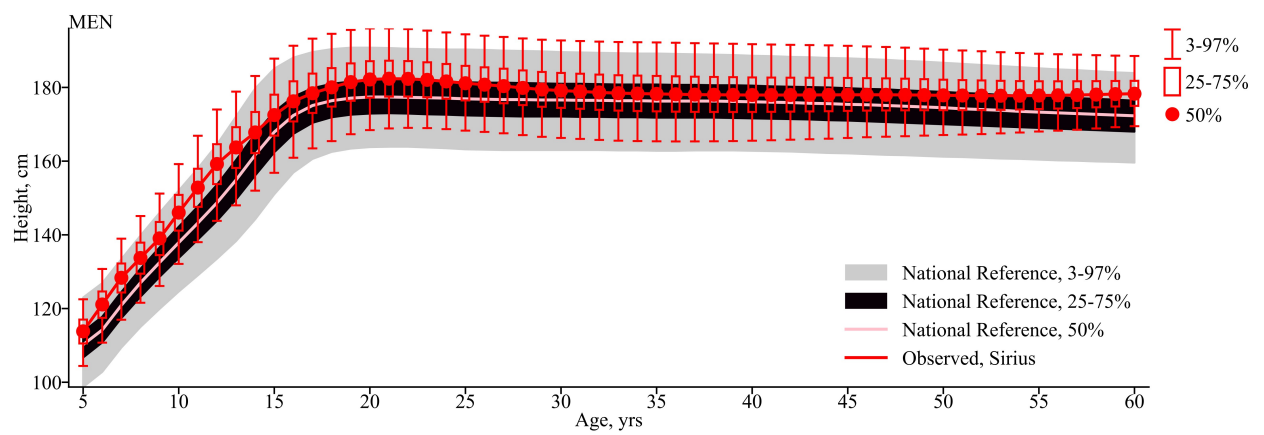

S10

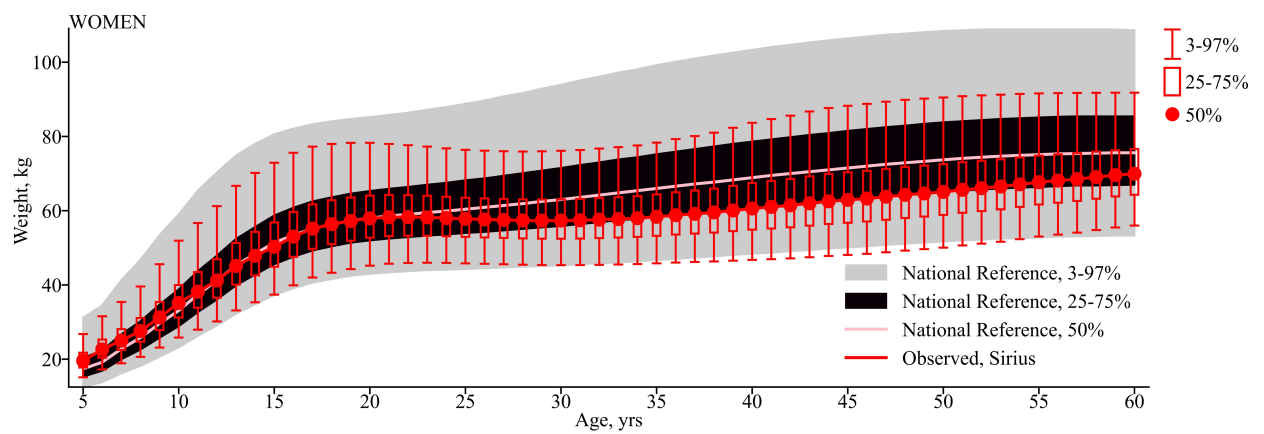

S11

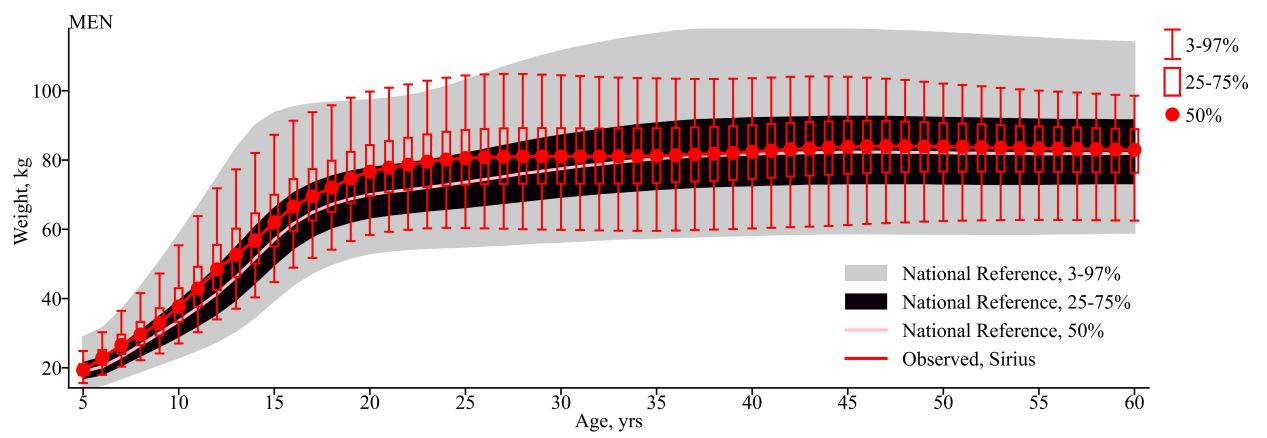

S12

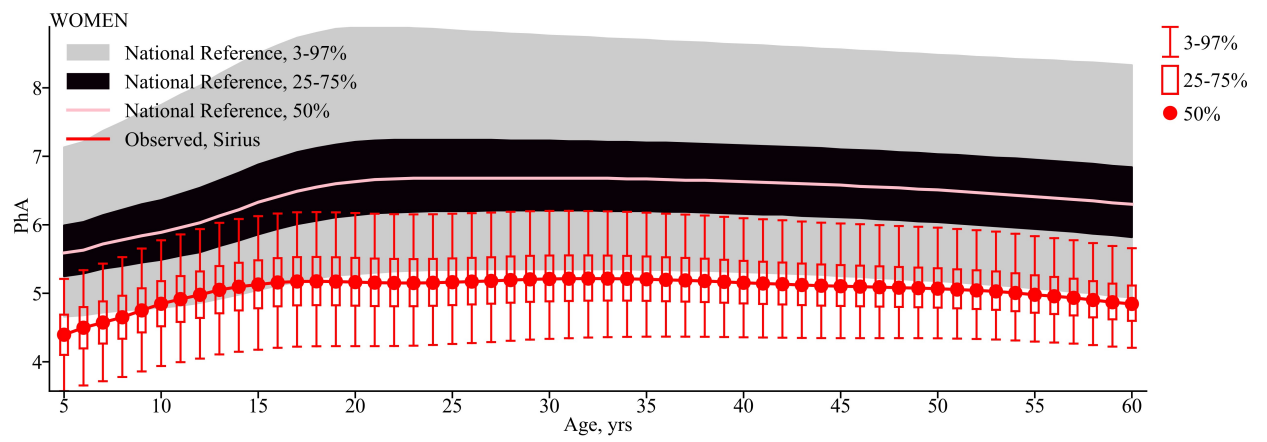

S13

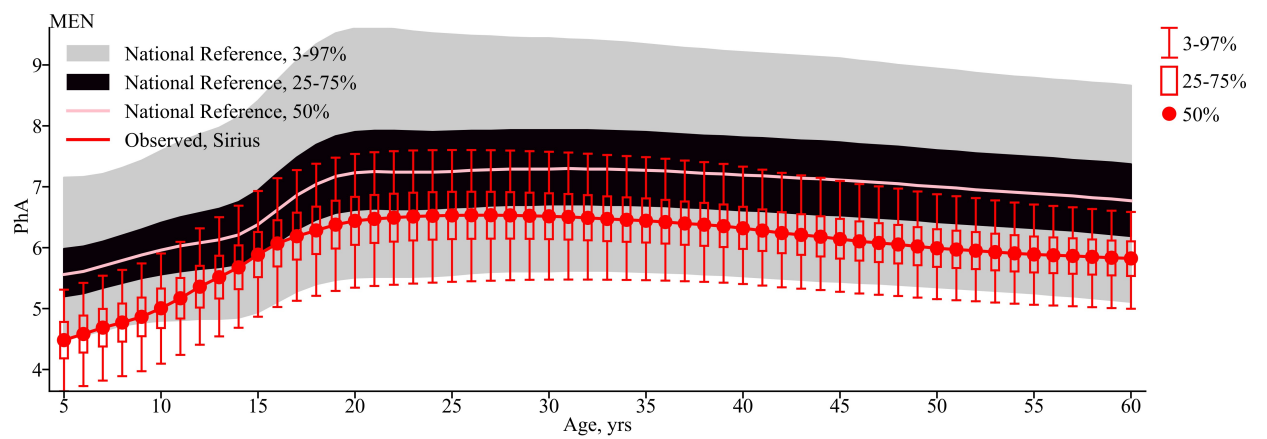

S14

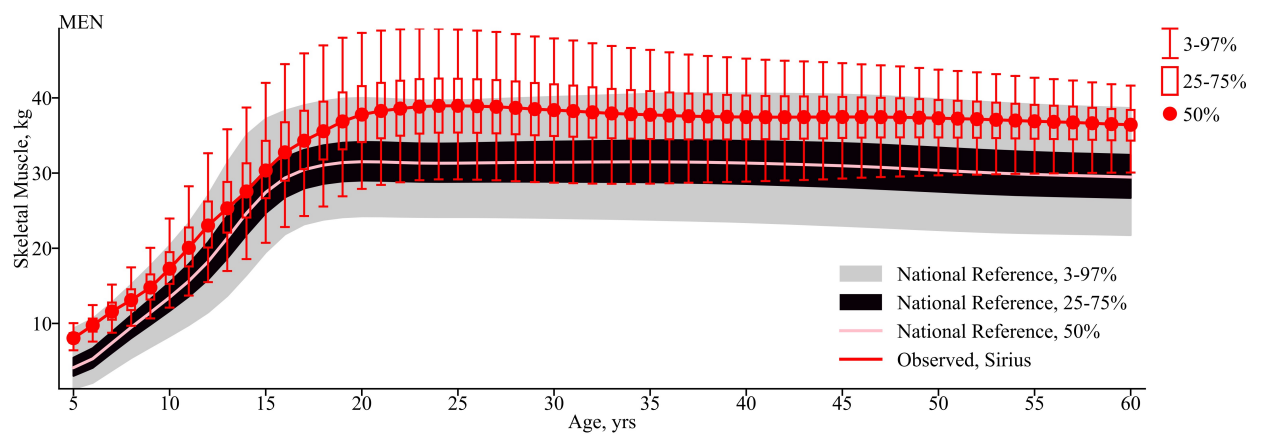

S15

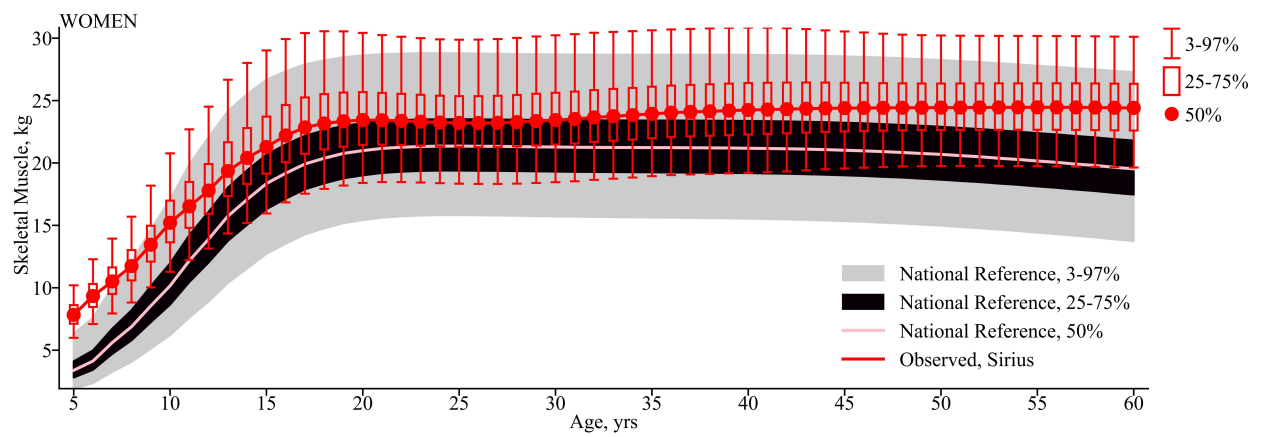

S16

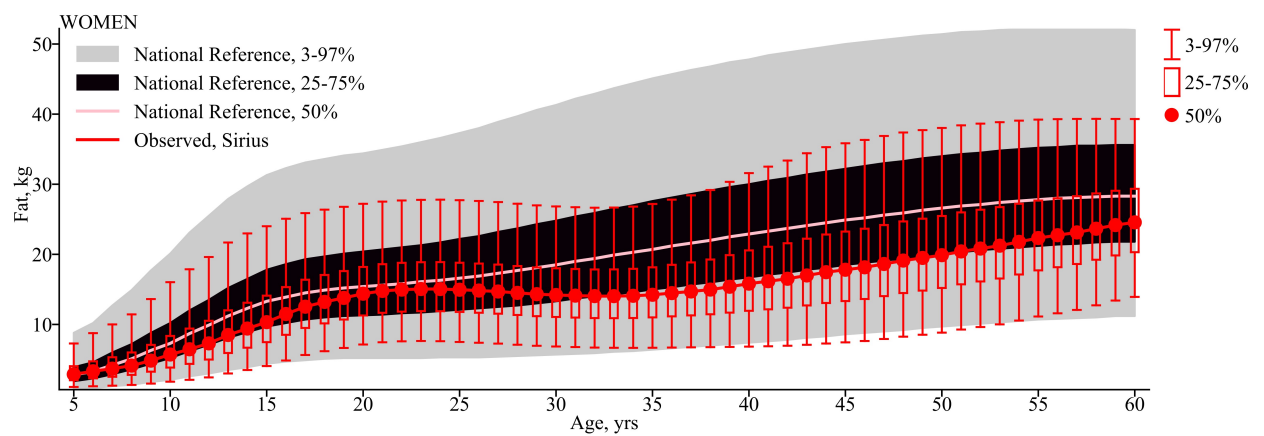

S17

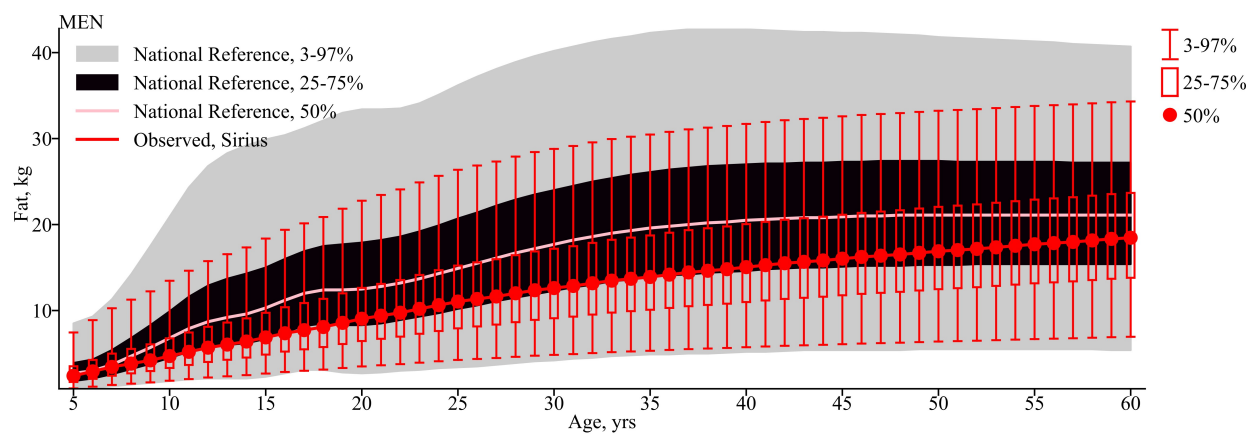

S18
