# Supplementary material for: Bioimpedance study of body composition and phase angle in children, adolescents and adults of the Federal Territory Sirius
Source: Research Square preprint supplement (doi:10.21203/rs.3.rs-8619225/v1), 2026-01-30
Supplement: Supplementary file 1 [file f224bba927f188155c8e4503.docx]

***Table 1*. General characteristics of the study group, M (SD)**

| Age category | Sex | Number of subjects | BH, cm | BW, kg | BMI, kg/m2 |
| --- | --- | --- | --- | --- | --- |
| First childhood (4-7 y.о.) | F | 113 | 119.3 (7.8) | 22.4 (4.1) | 15.6 (1.7) |
| First childhood (4-7 y.о.) | М | 148 | 121.5 (8.3) | 23.4 (4.4) | 15.8 (1.4) |
| Second childhood (8-11 y.о.) | F | 162 | 139.9 (8.7) | 32.9* (7.7) | 16.6* (2.3) |
| Second childhood (8-12 y.о.) | М | 319 | 141.1 (10.4) | 35.5 (10.0) | 17.5 (2.7) |
| Adolescent age (12-15 y.о.) | F | 177 | 159.1* (8.2) | 50.6* (11.3) | 19.8* (3.5) |
| Adolescent age (13-16 y.о.) | М | 562 | 172.4 (10.9) | 63.8 (13.4) | 21.3 (3.7) |
| Youth age (16-20 y.о.) | F | 164 | 165.8 (6.4)* | 58.6* (7.7) | 21.3* (2.5) |
| Youth age (17-21 y.о.) | М | 231 | 181.1 (7.0) | 75.4 (12.7) | 22.9 (3.2) |
| Mature age – 1st period (21-35 y.о.) | F | 431 | 165.0* (7.9) | 58.8* (9.7) | 21.9* (8.0) |
| Mature age – 1st period (22-35 y.о.) | М | 413 | 179.6 (7.3) | 80.5 (12.8) | 24.9 (3.3) |
| Mature age – 2nd period (36-55 y.о.) | F | 282 | 165.2* (6.1) | 63.9* (11.4) | 23.4* (4.1) |
| Mature age – 2nd period (36-60 y.о.) | М | 242 | 178.4 (6.6) | 83.9 (12.7) | 26.3 (3.5) |
| Elderly age (56-74 y.о.) | F | 14 | 163.4 (6.2) | 72.2 (10.9) | 27.0 (3.3) |

*Designations*: BH – body height, BW – body weight, BMI – body mass index, M – mean, SD – standard deviation.

*- Significant sex differences in the considered age subgroup (p<0.05).
