# Supplementary material for: Bioimpedance study of body composition and phase angle in children, adolescents and adults of the Federal Territory Sirius
Source: Research Square preprint supplement (doi:10.21203/rs.3.rs-8619225/v1), 2026-01-30
Supplement: Supplementary file 2 [file fed02c916c8f2543ff134c49.docx]

***Table 2*. Body composition and phase angle of the study group, M (SD)**

| Age category | Sex | SMM, kg | BF, kg | %SMM,% | %BF, % | PA, grad |
| --- | --- | --- | --- | --- | --- | --- |
| First childhood (4-7 y.о.) | F | 9.0* (1.6) | 3.8* (2.1) | 40.4* (3.2) | 16.2* (6.2) | 4.5* (0.4) |
| First childhood (4-7 y.о.) | М | 10.0 (1.9) | 3.2 (2.0) | 42.7 (2.9) | 13.1 (5.2) | 4.6 (0.4) |
| Second childhood (8-11 y.о.) | F | 14.0* (2.9) | 5.8 (3.9) | 42.9 (4.0) | 16.5 (7.4) | 4.8* (0.5) |
| Second childhood (8-12 y.о.) | М | 15.3 (3.7) | 6.2 (4.7) | 43.7 (3.7) | 16.0 (7.4) | 4.9 (0.5) |
| Adolescent age (12-15 y.о.) | F | 21.7* (3.9) | 10.5* (6.2) | 43.4* (3.9) | 19.5* (7.4) | 5.1* (0.6) |
| Adolescent age (13-16 y.о.) | М | 31.6 (6.9) | 7.4 (4.9) | 49.5 (3.5) | 11.4 (5.7) | 5.9 (0.6) |
| Youth age (16-20 y.о.) | F | 23.9* (3.0) | 14.7* (5.4) | 41.0* (3.7) | 24.6* (6.4) | 5.2* (0.5) |
| Youth age (17-21 y.о.) | М | 37.2 (5.3) | 9.9 (7.0) | 49.6 (3.2) | 12.7 (5.4) | 6.4 (0.6) |
| Mature age – 1st period (21-35 y.о.) | F | 23.6* (3.5) | 15.6* (6.7) | 40.4* (4.3) | 25.9* (7.1) | 5.2* (0.5) |
| Mature age – 1st period (22-35 y.о.) | М | 38.0 (5.3) | 13.7 (7.1) | 47.5 (3.8) | 16.5 (6.5) | 6.5 (0.6) |
| Mature age – 2nd period (36-55 y.о.) | F | 24.7* (3.3) | 18.7* (8.4) | 39.1* (4.4) | 28.3* (8.0) | 5.2* (0.5) |
| Mature age – 2nd period (36-60 y.о.) | М | 37.9 (4.7) | 17.1 (8.2) | 45.5 (4.1) | 19.7 (7.1) | 6.2 (0.7) |
| Elderly age (56-74 y.о.) | F | 24.9 (2.9) | 26.5 (7.5) | 34.7 (3.3) | 36.1 (5.8) | 4.8 (0.5) |

*Designations*: SMM – skeletal-muscle mass, BF – body fat mass, %SMM – percentage skeletal-muscle mass, %BF – percentage body fat, PA – phase angle, M – mean, SD – standard deviation.

*- Significant sex differences in the considered age subgroup (p<0.05), key between-sex contrasts (Δ, 95% CI, p) are reported in the Results text
